# Supplementary material
Source: Springer Nature journal article supplement (https://www.springermedizin.de/resource/supplementary/12891_2008_557_MOESM1_ESM.pdf/9511332)

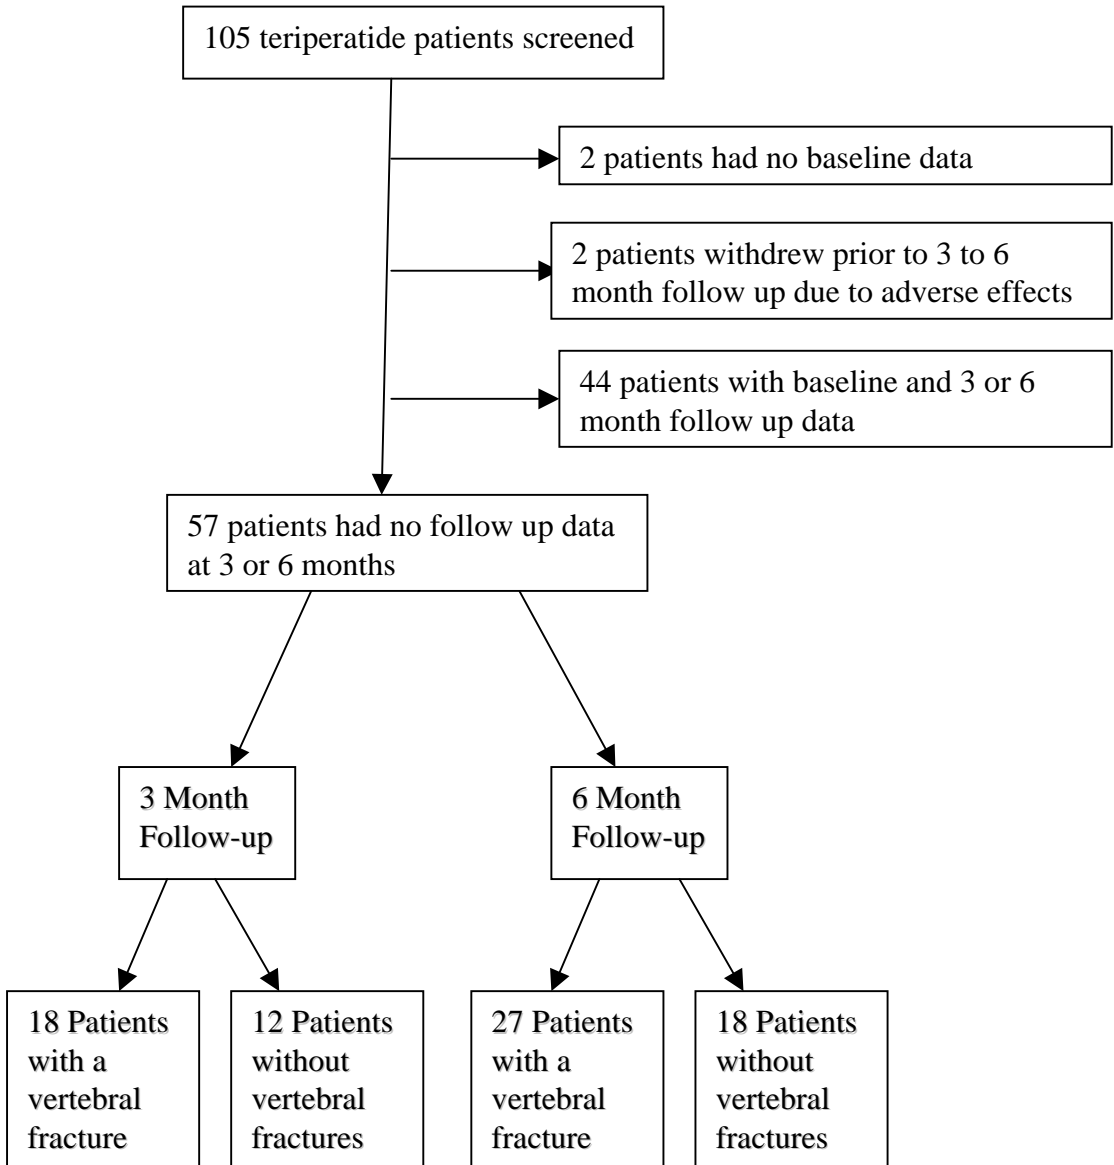

Supplement: MOESM1 [file 9511332]
